# Supplementary material for: Noninvasive Relative Quantification of [11C]ABP688 PET Imaging in Mice Versus an Input Function Measured Over an Arteriovenous Shunt
Source: Front Neurol. 2018 Jun 29;9:516. doi: 10.3389/fneur.2018.00516 (PMC6036254; doi:10.3389/fneur.2018.00516)
Supplement: Supplementary Table 2 — Relationship between VT and DVR-1 [11C]ABP688 quantification based on invasive (AV shunt) and noninvasive input function (IDIF). AV, arteriovenous; IDIF, image-derived input function; DVR, distribution volume ratio; r, Pearson's correlation; r2, coefficient of determination. [file Table_2.DOCX]

Supplementary Material

**Noninvasive relative quantification of [11C]ABP688 PET imaging in mice versus an input function measured over an arteriovenous shunt**

**Jeroen Verhaeghe1, Daniele Bertoglio1, Lauren Kosten1, David Thomae1,2, Marleen Verhoye3, Annemie Van Der Linden3, Leonie wyffels1,2, Sigrid Stroobants1,2, John Wityak4, Celia Dominguez4, Ladislav Mrzljak4, Steven Staelens1**

1Molecular Imaging Center Antwerp (MICA), University of Antwerp, Wilrijk, Belgium

2Department of Nuclear Medicine, Antwerp University Hospital, Edegem, Belgium

3 Bio-Imaging Lab, University of Antwerp, Wilrijk, Belgium

4CHDI Foundation, Princeton, NJ, United States of America

*** Correspondence:**

Prof. Steven Staelens

Molecular Imaging Center Antwerp (MICA)

Faculty of Medicine and Health Sciences

University of Antwerp

Universiteitsplein 1, Wilrijk, Belgium

Tel. +32 03265 2820

Email: [steven.staelens@uantwerpen.be](mailto:steven.staelens@uantwerpen.be)

# Supplementary Figures and Tables

**Supplementary Table 2 |** Relationship between VT and DVR-1 [11C]ABP688 quantification based on invasive (AV shunt) and noninvasive input function (IDIF).

AV = arteriovenous, IDIF = image-derived input function, DVR = distribution volume ratio, r = Pearson’s correlation, r2 = coefficient of determination.
